# Supplementary material
Source: publisher figshare collection journal article supplement (https://aacr.figshare.com/articles/dataset/_/23905309)

**Supplementary Figure S4.** Kaplan–Meier estimates of time to progression and overall survival according to etiology in the intent-to-treat population. (A) Time to progression. (B) Overall survival. (C) Progression-free survival. Abbreviations: CI, confidence interval; OS, overall survival; PFS, progression-free survival; TTP, time to progression.

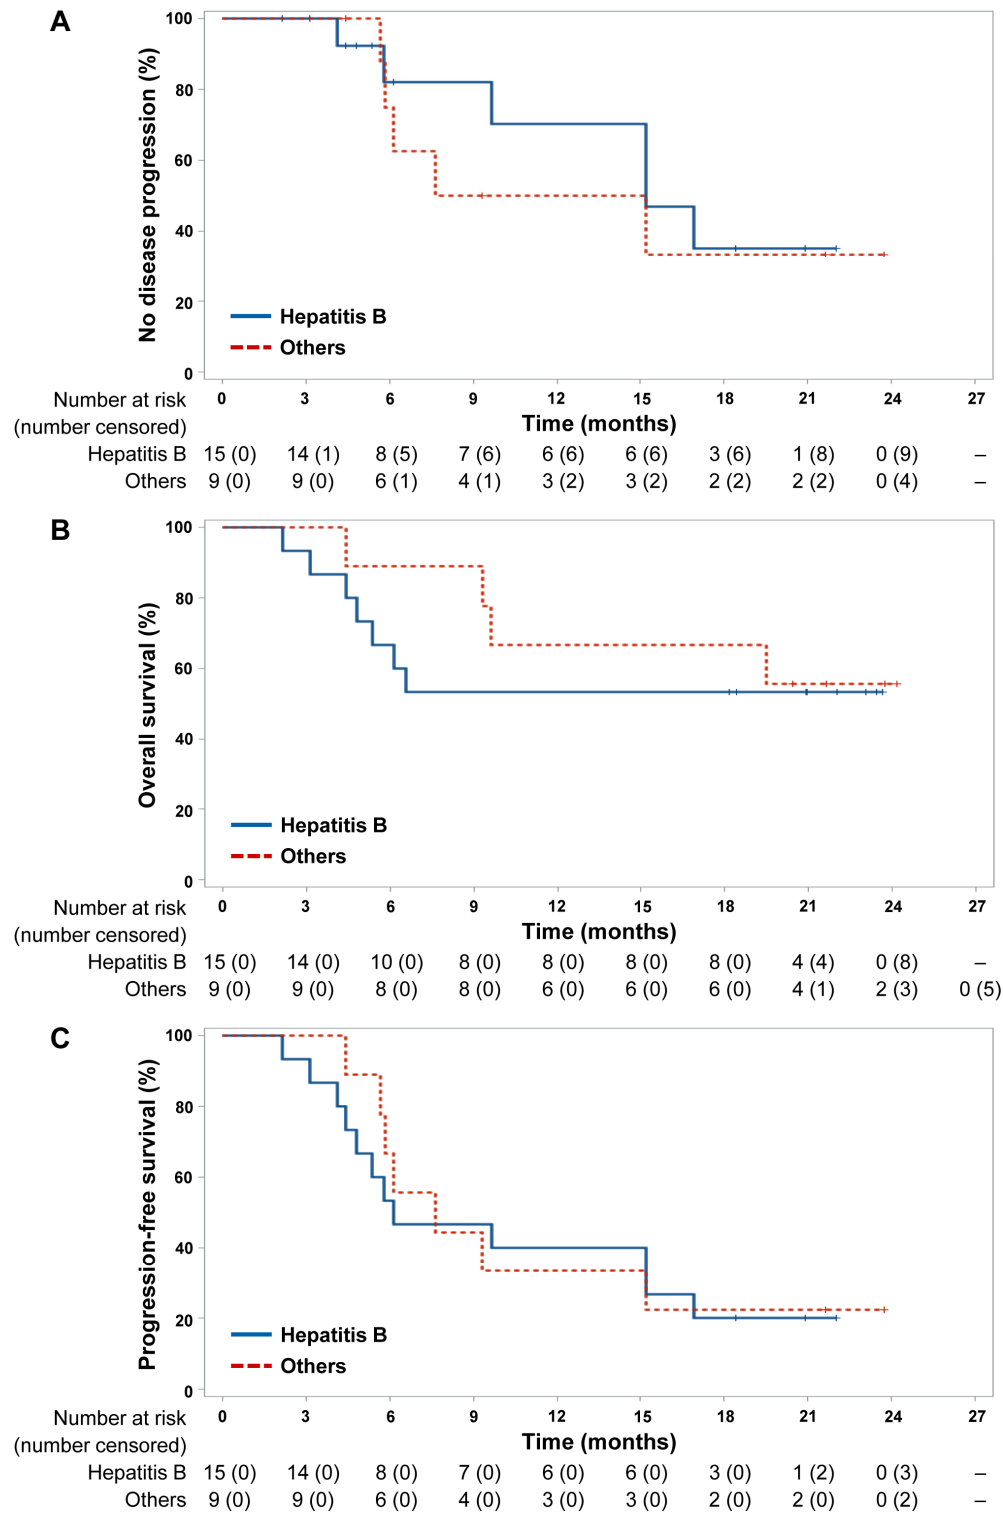

Supplement: Supplementary file 1 [file 41911495]
